# Supplementary material for: Long-Term Safety and Efficacy of Drug-Eluting versus Bare-Metal Stents in Sweden
Source: Atypon-hosted journal article supplement (doi:10.1056/nejmoa0809902), 2009-05-06
Supplement: nejm_james_1933sa1.pdf [file nejm_james_1933sa1.pdf]

## Supplementary Appendix

This appendix has been provided by the authors to give readers additional information about their work.

Supplement to: James SK, Stenestrand U, Lindbäck J, et al. Long-term safety and efficacy of drug-eluting versus bare-metal stents in Sweden. *N Engl J Med* 2009;360:1933-45.

Online supplement

Table I. Baseline characteristics by year in one stent cohort.

|                       | 2003        |             | 2004        |             | 2005        |             | 2006        |             |
|-----------------------|-------------|-------------|-------------|-------------|-------------|-------------|-------------|-------------|
|                       | BMS         | DES         | BMS         | DES         | BMS         | DES         | BMS         | DES         |
|                       | N=4882      | N=1132      | N=4765      | N=2334      | N=4023      | N=3668      | N=4989      | N=3160      |
| Age: mean (sd)        | 64.7 (10.8) | 63.1 (10.9) | 65.7 (10.7) | 64.1 (10.7) | 66.2 (11.0) | 65.2 (10.9) | 66.5 (11.2) | 65.6 (10.7) |
| Male gender, %        | 72.90       | 69.40       | 71.80       | 70.10       | 72.60       | 70.70       | 71.60       | 70.60       |
| Region, %             |             |             |             |             |             |             |             |             |
| North                 | 12.80       | 2.0         | 13.60       | 2.4         | 16.30       | 3.6         | 15.20       | 2.2         |
| Stockholm             | 19.00       | 18.80       | 20.20       | 15.80       | 18.80       | 13.70       | 18.90       | 11.40       |
| Southeast             | 12.40       | 15.00       | 8.8         | 13.90       | 11.20       | 14.10       | 13.00       | 14.10       |
| South                 | 19.10       | 25.20       | 15.50       | 28.10       | 13.80       | 26.40       | 14.70       | 24.60       |
| Middle                | 30.90       | 38.90       | 23.70       | 39.60       | 17.00       | 37.50       | 19.30       | 40.80       |
| West                  | 5.7         | 0.1         | 18.20       | 0.2         | 22.90       | 4.7         | 18.90       | 7.0         |
| Indication :          |             |             |             |             |             |             |             |             |
| Stable CAD            | 23.70       | 32.30       | 19.90       | 29.20       | 16.70       | 25.40       | 15.50       | 23.60       |
| Unstable CAD          | 54.60       | 51.90       | 48.50       | 50.30       | 45.80       | 51.80       | 45.70       | 53.40       |
| STEMI                 | 20.80       | 14.40       | 31.10       | 19.50       | 36.50       | 21.30       | 37.10       | 20.90       |
| Other                 | 1.0         | 1.3         | 0.5         | 1.0         | 1.0         | 1.5         | 1.6         | 2.1         |
| Smoking :             |             |             |             |             |             |             |             |             |
| Never                 | 35.70       | 39.20       | 36.00       | 40.50       | 37.60       | 41.10       | 40.30       | 42.80       |
| Former                | 31.20       | 31.50       | 30.40       | 30.50       | 29.00       | 31.50       | 29.90       | 34.80       |
| Current               | 22.00       | 18.50       | 21.40       | 19.80       | 22.00       | 20.30       | 22.50       | 18.40       |
| Unknown               | 11.10       | 10.80       | 12.20       | 9.1         | 11.40       | 7.1         | 7.3         | 3.9         |
| Concurrent disease:-% |             |             |             |             |             |             |             |             |
| Diabetes              | 17.30       | 24.50       | 16.90       | 24.30       | 17.40       | 23.40       | 18.00       | 23.50       |
| Hyperlipidemia: Yes   | 50.60       | 61.60       | 46.30       | 49.80       | 45.20       | 50.00       | 42.10       | 50.40       |
| No                    | 42.00       | 32.40       | 48.80       | 44.80       | 50.80       | 45.90       | 55.30       | 47.50       |
| Unknown               | 7.5         | 6.0         | 4.9         | 5.4         | 4.0         | 4.1         | 2.7         | 2.1         |
| Hypertension, Yes     | 42.80       | 45.00       | 43.50       | 44.40       | 45.20       | 46.30       | 45.10       | 48.70       |
| No                    | 53.80       | 51.70       | 54.00       | 52.70       | 51.40       | 49.90       | 52.60       | 49.50       |
| Unknown               | 3.4         | 3.4         | 2.6         | 2.9         | 3.4         | 3.8         | 2.3         | 1.8         |

|                           |            |            |            |            |            |            |            |            |
|---------------------------|------------|------------|------------|------------|------------|------------|------------|------------|
| Heart failure             | 6.7        | 8.6        | 5.9        | 6.3        | 6.3        | 7.1        | 6.4        | 6.6        |
| Renal failure             | 0.9        | 1.8        | 1.3        | 1.6        | 1.4        | 1.3        | 1.4        | 1.6        |
| Dialysis                  | 0.2        | 1.0        | 0.2        | 0.7        | 0.4        | 0.5        | 0.3        | 0.5        |
| COPD                      | 5.4        | 5.6        | 6.3        | 5.2        | 6.3        | 5.9        | 7.2        | 5.7        |
| Dementia                  | 0.1        | 0.0        | 0.1        | 0.1        | 0.1        | 0.1        | 0.1        | 0.0        |
| Periferal vessel disease  | 3.2        | 3.9        | 3.1        | 3.5        | 3.2        | 3.4        | 3.1        | 3.7        |
| Previous disease          |            |            |            |            |            |            |            |            |
| Cancer < 3 years before   | 2.4        | 1.9        | 2.1        | 2.7        | 2.7        | 2.2        | 2.9        | 2.7        |
| PCI                       | 12.40      | 25.50      | 10.40      | 14.30      | 8.3        | 12.40      | 7.3        | 12.80      |
| CABG                      | 10.60      | 13.20      | 8.9        | 9.9        | 8.1        | 10.70      | 7.3        | 12.00      |
| MI                        | 35.10      | 40.40      | 29.00      | 30.50      | 23.10      | 26.90      | 19.90      | 25.30      |
| Stroke                    | 5.6        | 6.0        | 5.5        | 5.9        | 6.2        | 6.2        | 6.4        | 6.6        |
| Medical treatment         |            |            |            |            |            |            |            |            |
| ASA before PCI            | 83.30      | 84.30      | 88.30      | 90.40      | 89.50      | 92.30      | 91.00      | 92.70      |
| Clopidogrel before PCI    | 48.10      | 48.10      | 58.10      | 63.50      | 67.90      | 71.20      | 76.00      | 74.60      |
| GP IIb/IIIa inhibitors    | 34.00      | 30.90      | 38.30      | 29.90      | 41.00      | 26.00      | 38.80      | 22.50      |
| Angio findings, %         |            |            |            |            |            |            |            |            |
| Normal                    | 0.3        | 0.4        | 0.3        | 0.3        | 0.3        | 0.4        | 0.3        | 0.1        |
| 1-vessel                  | 56.60      | 58.20      | 56.50      | 60.00      | 55.80      | 55.40      | 54.30      | 58.30      |
| 2-vessel                  | 23.70      | 22.00      | 24.70      | 21.50      | 23.90      | 23.90      | 25.80      | 22.40      |
| 3-vessel                  | 13.70      | 13.10      | 14.80      | 14.10      | 14.60      | 14.20      | 15.70      | 14.10      |
| Left main                 | 3.4        | 3.7        | 3.6        | 4.0        | 3.0        | 3.9        | 3.6        | 4.7        |
| Unknown                   | 2.4        | 2.6        | 0.0        | 0.1        | 2.3        | 2.2        | 0.3        | 0.3        |
| Complete revasc, %        |            |            |            |            |            |            |            |            |
| No                        | 34.40      | 31.40      | 35.70      | 29.70      | 35.20      | 32.50      | 39.40      | 32.50      |
| Yes                       | 56.90      | 56.10      | 59.60      | 60.70      | 63.30      | 64.90      | 60.40      | 67.20      |
| Unknown                   | 8.7        | 12.50      | 4.7        | 9.6        | 1.5        | 2.6        | 0.2        | 0.3        |
| Stent diameter: mean (sd) | 3.1 (0.5)  | 3.0 (0.4)  | 3.14 (0.5) | 2.9 (0.4)  | 3.2 (0.5)  | 2.9 (0.4)  | 3.2 (0.5)  | 2.9 (0.5)  |
| Stent length: mean (sd)   | 15.7 (5.1) | 18.5 (6.5) | 16.5 (5.3) | 18.7 (6.1) | 16.9 (5.2) | 18.4 (6.0) | 16.8 (4.9) | 18.8 (6.1) |
| Treated vessel, %         |            |            |            |            |            |            |            |            |
| RCA                       | 31.90      | 12.90      | 35.50      | 16.40      | 35.60      | 20.20      | 33.60      | 19.20      |
| LM                        | 1.0        | 2.4        | 0.9        | 2.1        | 0.6        | 2.2        | 0.9        | 2.5        |
| LAD                       | 41.00      | 65.60      | 35.30      | 60.60      | 38.30      | 51.60      | 40.70      | 52.40      |
| LCx                       | 22.20      | 15.60      | 24.50      | 17.70      | 22.10      | 22.50      | 22.50      | 22.20      |
| Graft                     | 3.9        | 3.4        | 3.8        | 3.3        | 3.4        | 3.6        | 2.3        | 3.7        |

|                     |       |       |       |       |       |       |       |       |
|---------------------|-------|-------|-------|-------|-------|-------|-------|-------|
| Stenosis type, %    |       |       |       |       |       |       |       |       |
| DeNovo              | 98.50 | 87.40 | 99.20 | 96.30 | 99.40 | 97.20 | 99.50 | 97.20 |
| Restenosis          | 1.1   | 4.0   | 0.4   | 1.6   | 0.4   | 0.9   | 0.3   | 0.9   |
| In-stent restenosis | 0.4   | 8.7   | 0.4   | 2.1   | 0.1   | 1.9   | 0.2   | 1.9   |
| Occlusion           |       |       |       |       |       |       |       |       |
| No                  | 79.20 | 81.90 | 70.10 | 77.80 | 67.80 | 76.20 | 68.80 | 76.30 |
| Yes < 3months       | 19.00 | 13.90 | 28.80 | 19.80 | 31.40 | 21.30 | 30.70 | 20.40 |
| Yes >= 3months      | 1.8   | 4.2   | 1.1   | 2.4   | 0.7   | 2.5   | 0.5   | 3.3   |

---

Figure I.

A) Death for patients in the total cohort

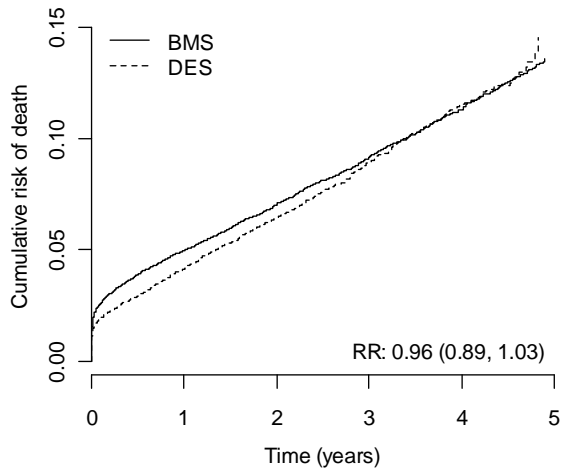

|     |       |       |       |       |      |   |
|-----|-------|-------|-------|-------|------|---|
| BMS | 28286 | 26843 | 19429 | 13592 | 6682 | 7 |
| DES | 19681 | 18893 | 12691 | 6065  | 1964 | 0 |

B) Myocardial infarction for patients in the total cohort

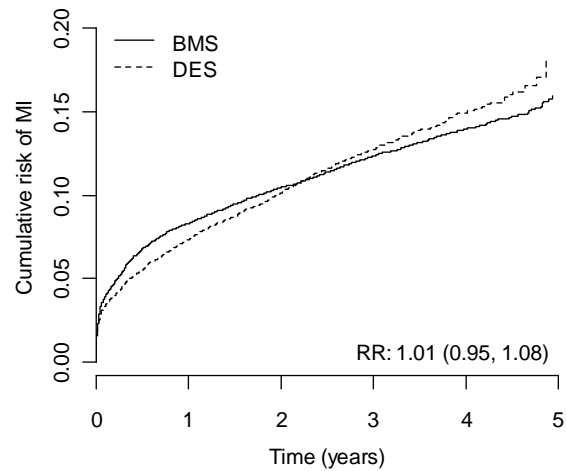

|     |       |       |       |       |      |   |
|-----|-------|-------|-------|-------|------|---|
| BMS | 28286 | 24832 | 17636 | 12149 | 5956 | 5 |
| DES | 19681 | 17593 | 11526 | 5367  | 1687 | 0 |

Figure II Death or MI in the total cohort of patients treated 2003-2004

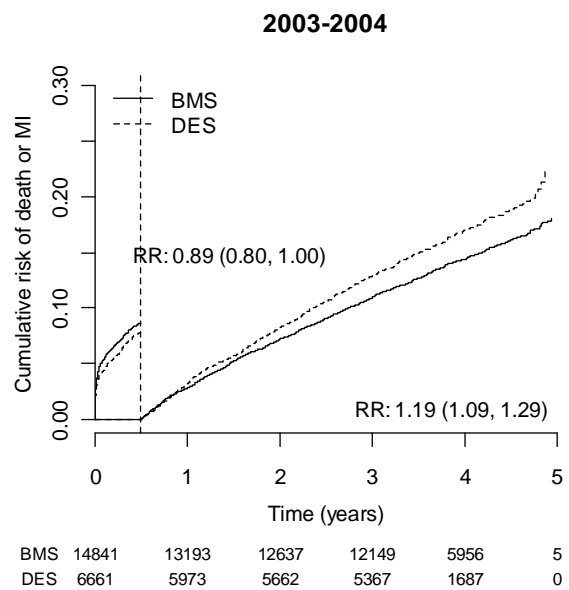

Figure III. Restenosis in patients who received only one stent

A. Unadjusted

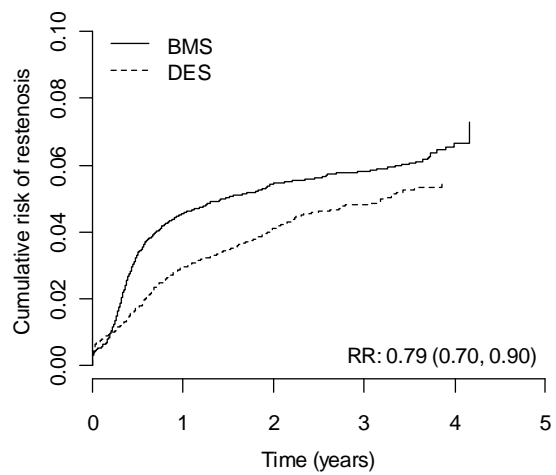

|     |       |       |      |      |     |   |
|-----|-------|-------|------|------|-----|---|
| BMS | 12358 | 11240 | 7897 | 4429 | 760 | 0 |
| DES | 8648  | 8080  | 6377 | 2721 | 349 | 0 |

B. Adjusted

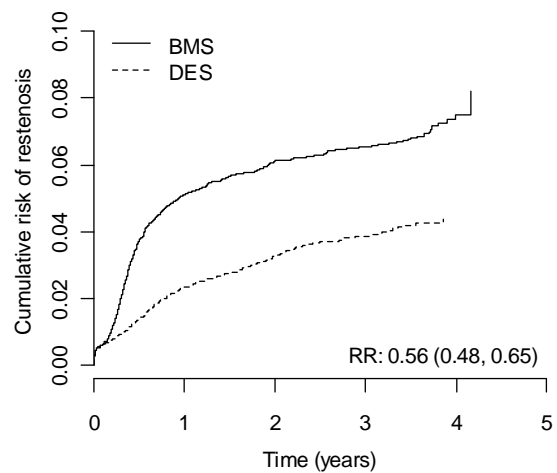

|     |       |       |      |      |     |   |
|-----|-------|-------|------|------|-----|---|
| BMS | 12358 | 11240 | 7897 | 4429 | 760 | 0 |
| DES | 8648  | 8080  | 6377 | 2721 | 349 | 0 |
